# Supplementary material for: A long non-coding RNA PelncRNA1 is involved in Phyllostachys edulis response to UV-B stress
Source: PeerJ journal article supplement (doi:10.7717/peerj.15243), 2023-05-09

A

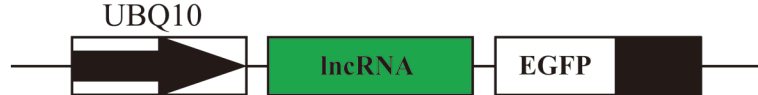

B

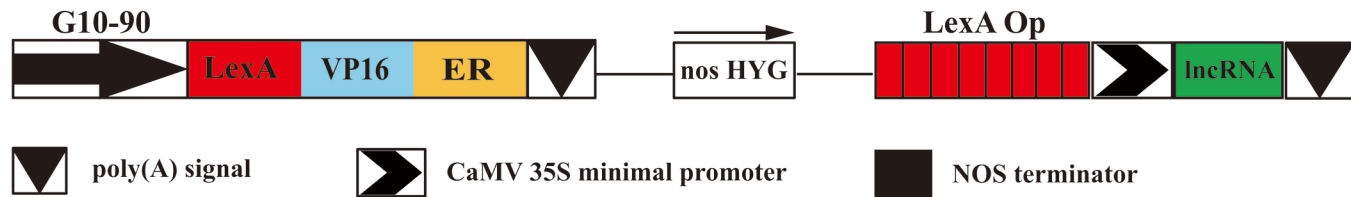

C

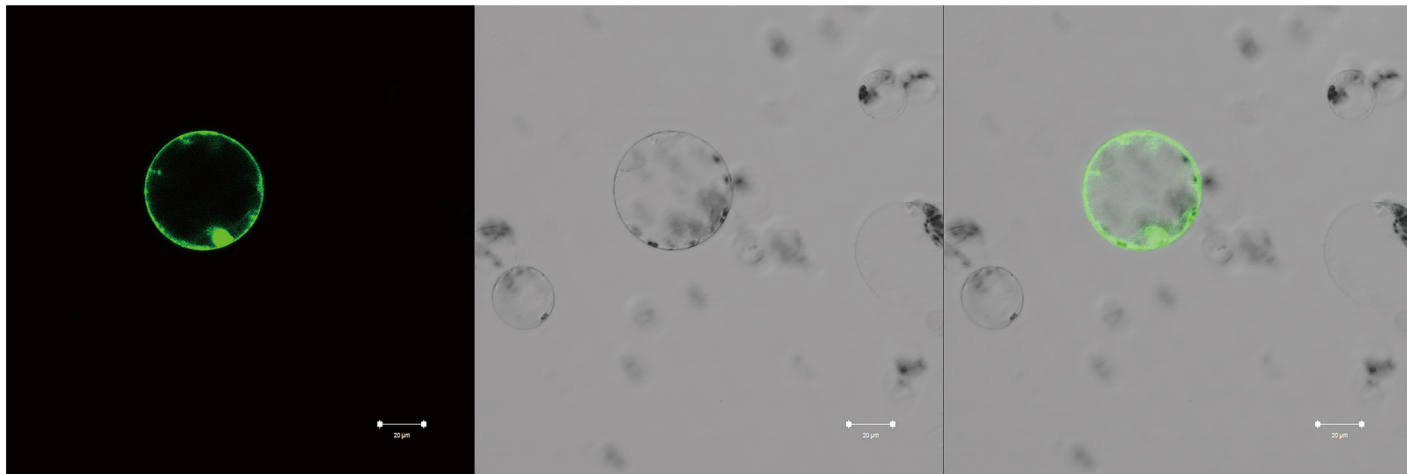

Supplement: Supplemental_Figure_S2.pdf [file Supplemental_Figure_S2.pdf]
