# Supplementary material for: A long non-coding RNA PelncRNA1 is involved in Phyllostachys edulis response to UV-B stress
Source: PeerJ journal article supplement (doi:10.7717/peerj.15243), 2023-05-09

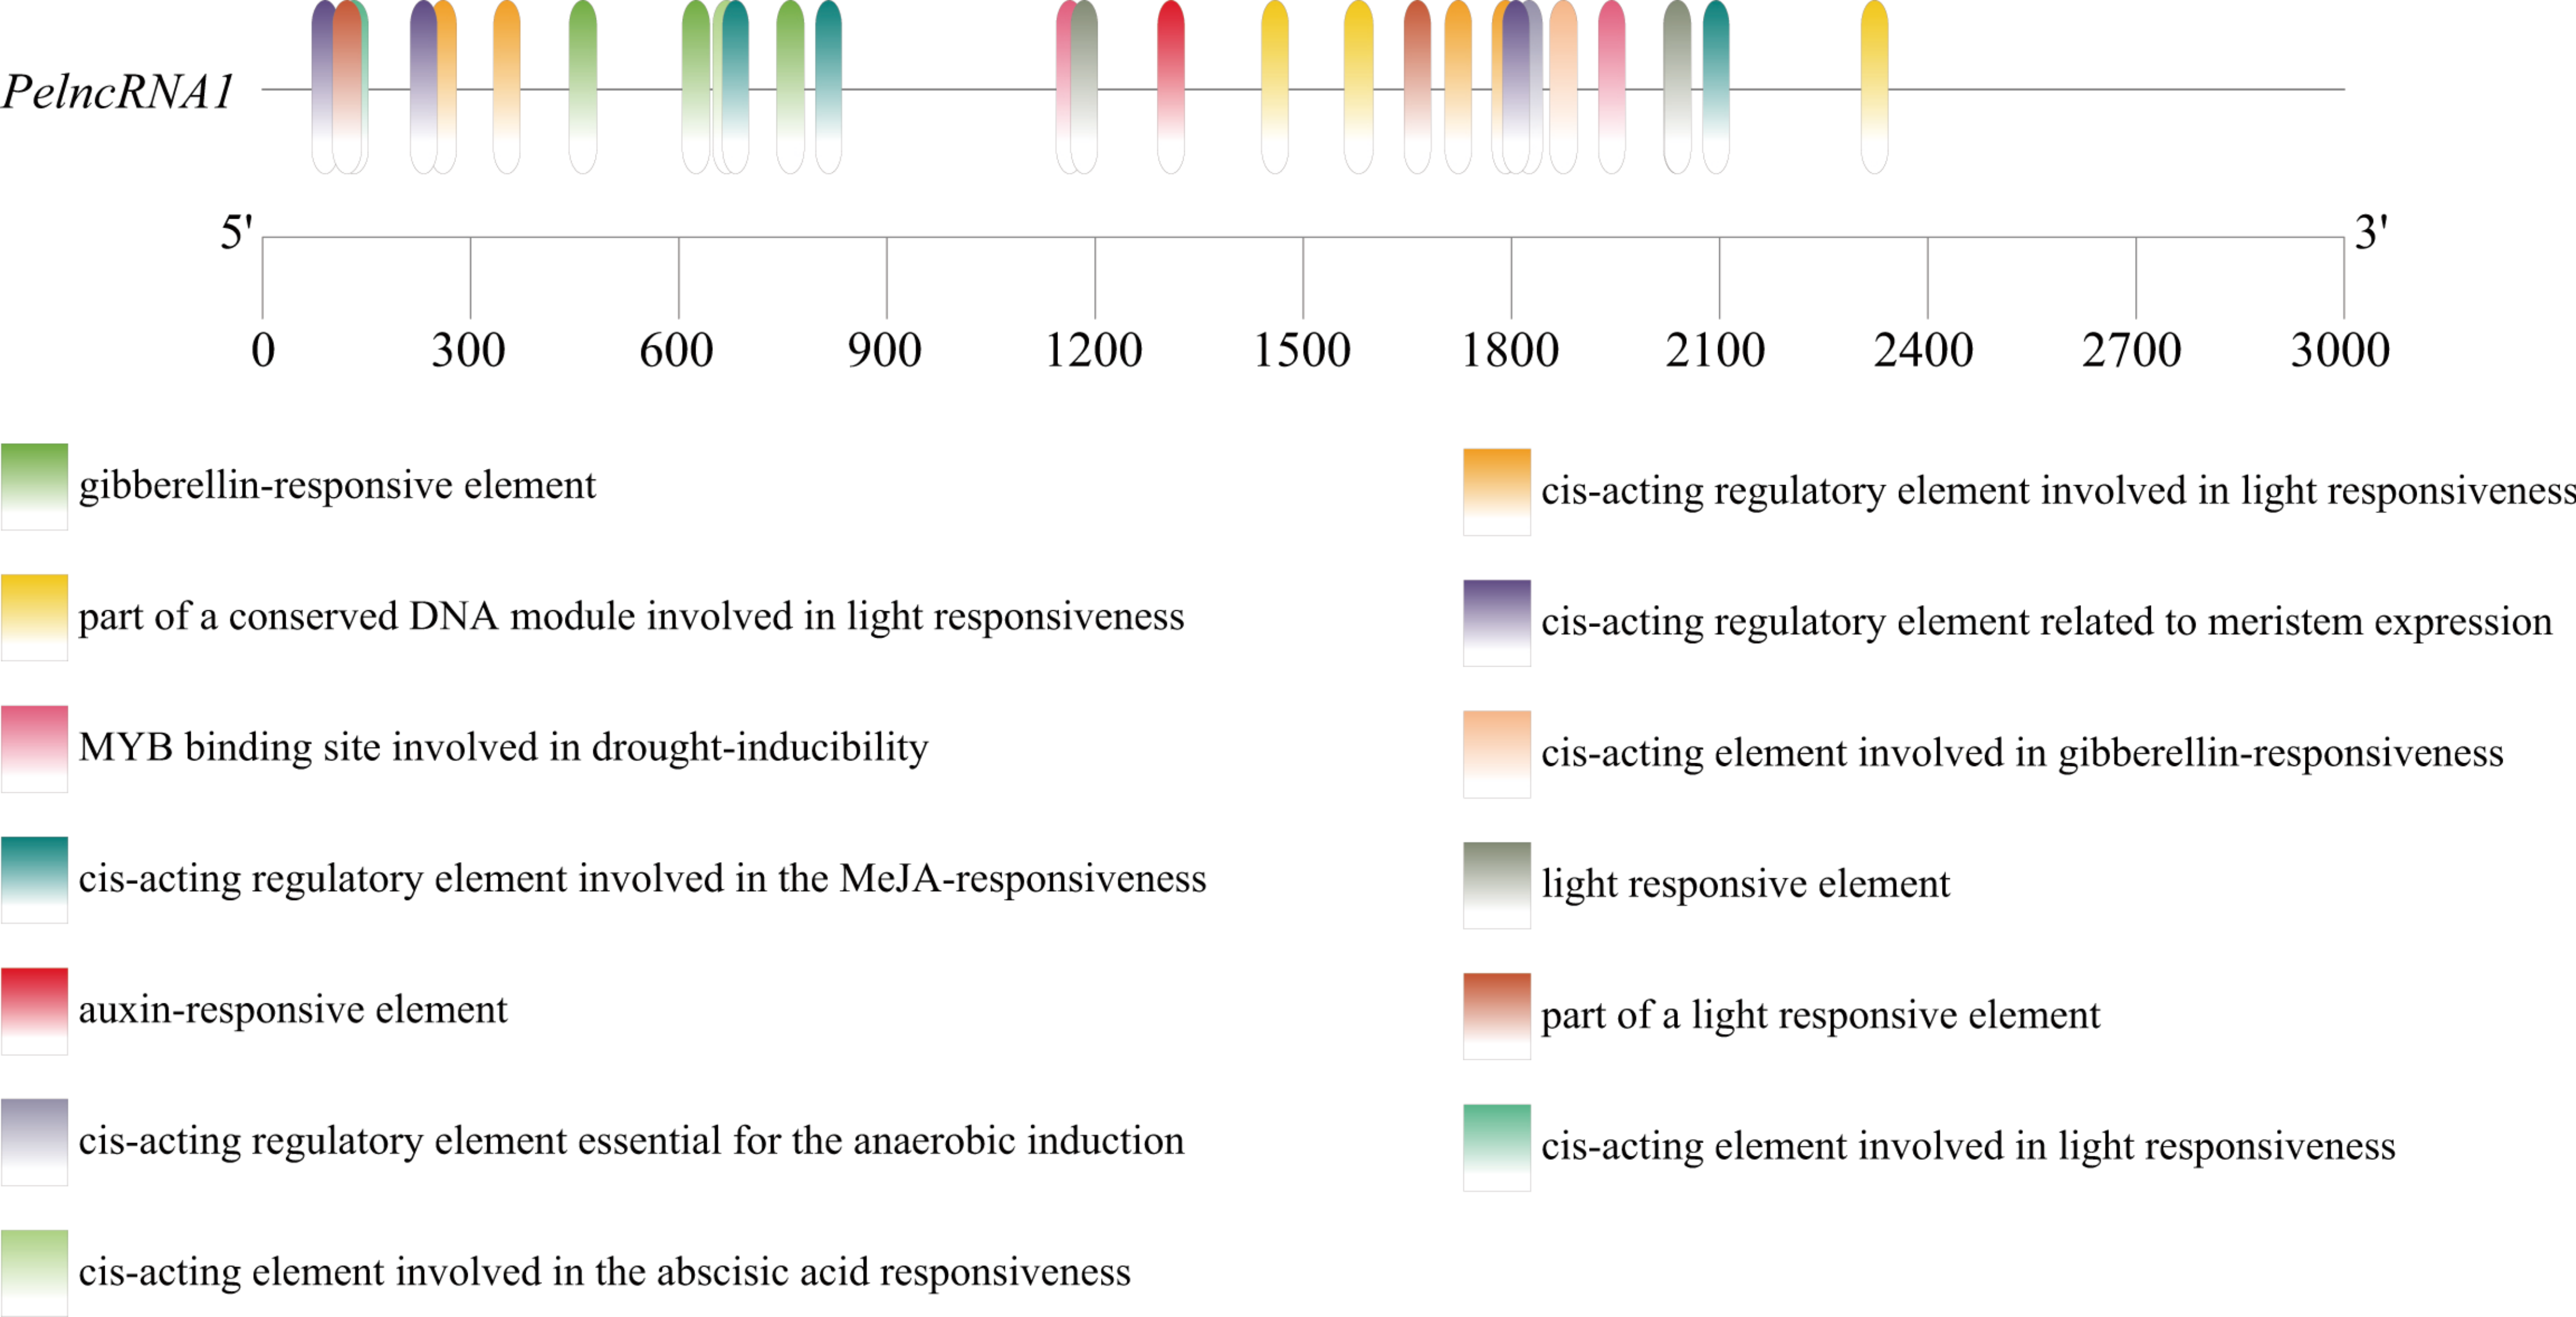

Supplement: Supplemental_Figure_S3.pdf [file Supplemental_Figure_S3.pdf]
